# Supplementary material for: Understanding Matrix Stiffness in Vinyl Polymer Hydrogels: Implications in Bone Tissue Engineering
Source: PubMed Central journal article supplement — ACS Omega. 2024 Mar 25;9(16):17891–902. doi: 10.1021/acsomega.3c08877 (PMC11044159; doi:10.1021/acsomega.3c08877), 2024-03-25
Supplement: ao3c08877_si_002.pdf [file ao3c08877_si_002.pdf]

### **Supporting Information paragraph:**

Material and methodology for ALP activity kinetics of hydrogels fabricated using ALP enzyme; (Table 1) Composition of the reagents used for hydrogel preparation; (Table 2) Nomenclature of all variations of hydrogel; (Figure S1) ALP activity kinetics of hydrogels fabricated using ALP enzyme; (Figure S2) Alizarin assay of native hydrogels without cells;

### **Content of material provided as supporting information**

- 1) Material and methodology for ALP activity kinetics of hydrogels fabricated using ALP enzyme.
- 2) Table 1 - Composition of the reagents used for hydrogel preparation
- 3) Table 2 - Nomenclature of all variations of hydrogel.
- 4) Figure S1 - ALP activity kinetics of hydrogels fabricated using ALP enzyme
- 5) Figure S2 - Alizarin assay of native hydrogels without cells.
